# Supplementary material
Source: PubMed Central journal article supplement (PMC6051351)
Supplement: NIHMS930364-supplement-2.pdf [file NIHMS930364-supplement-2.pdf]

**Supplementary Table 1.** Table of regions included in Fos network analysis.

| <b>Region of interest (ROI)</b>              | <b>Abbreviation</b> | <b>Atlas location*</b> |
|----------------------------------------------|---------------------|------------------------|
| Agranular insular cortex                     | AI                  | -1.80                  |
| Anterior Hypothalamic area                   | AH                  | -1.80                  |
| Basolateral amygdaloid nucleus, anterior     | BLA                 | -3.30                  |
| Basolateral amygdaloid nucleus, posterior    | BLP                 | -3.30                  |
| Basomedial amygdaloid nucleus, posterior     | BMA                 | -2.30                  |
| Bed nucleus of the stria terminalis, dorsal  | BSTd                | -0.30                  |
| Bed nucleus of the stria terminalis, ventral | BSTv                | -0.30                  |
| Central amygdaloid nucleus, medial           | CeM                 | -3.30                  |
| Central amygdaloid nucleus, lateral          | CeL                 | -3.30                  |
| Cingulate cortex                             | Cg1                 | +2.20                  |
| Dysgranular insular cortex                   | DI                  | -1.80                  |
| Granular insular cortex                      | GI                  | -1.80                  |
| Infralimbic cortex                           | IL                  | +2.20                  |
| Lateral amygdala                             | La                  | -3.30                  |
| Lateral hypothalamic area                    | LH                  | -1.80                  |
| Lateral septum                               | LS                  | -0.30                  |
| Medial amygdaloid nucleus, anterior          | MeA                 | -2.30                  |
| Medial amygdaloid nucleus, posterior         | MeP                 | -3.30                  |
| Medial preoptic nucleus                      | MPO                 | -0.30                  |
| Nucleus accumbens core                       | AcbC                | +2.20                  |
| Nucleus accumbens shell                      | AcbSh               | +2.20                  |
| Paraventricular nucleus of the hypothalamus  | PVN                 | -3.30                  |
| Periaqueductal gray, dorsal                  | PAGd                | -7.04                  |
| Periaqueductal gray, ventral lateral         | PAGvl               | -7.04                  |
| Periaqueductal gray, lateral                 | PAGl                | -7.04                  |
| Piriform cortex                              | Pir                 | -1.80                  |
| Prelimbic cortex                             | PL                  | +2.20                  |
| Reuniens thalamic nucleus                    | Re                  | -3.30                  |
| Ventromedial hypothalamus                    | VMH                 | -2.30                  |

\*Distance from Bregma in mm.
